# Supplementary material for: Prevalence-incidence bias in longitudinal studies of rheumatic heart disease in Fiji
Source: BMC Cardiovasc Disord. 2025 Dec 23;26:80. doi: 10.1186/s12872-025-05463-4 (PMC12837003; doi:10.1186/s12872-025-05463-4)
Supplement: Supplementary file 1 — Supplementary Material 1. [file 12872_2025_5463_MOESM1_ESM.xlsx]

## Sheet: Data
case	category	ethnicity	sex	age_entry	baseline_nyha	exit_study	primary_outcome_event_during	prior_outcome_event	time_to_primary_outcome	died	rhd_attr_death	time_to_death	arf_event	time_to_arf	heart_failure_event	time_to_heart_failure	stroke_event	time_to_stroke
1	Prevalent	iTaukei or Rotuman	Female	13.7467	1	548	no	no		no	no		no		no		no
2	Prevalent	iTaukei or Rotuman	Female	28.3751	1	680	no	no		no	no		no		no		no
3	Prevalent	iTaukei or Rotuman	Female	13.8754	1	658	no	no		no	no		no		no		no
4	Prevalent	iTaukei or Rotuman	Female	17.6454	1	401	no	no		no	no		no		no		no
5	Prevalent	iTaukei or Rotuman	Male	51.9562	1	553	no	no		no	no		no		no		no
6	Prevalent	iTaukei or Rotuman	Female	23.8001	1	707	no	no		no	no		no		no		no
7	Prevalent	iTaukei or Rotuman	Male	13.9767	1	617	no	no		no	no		no		no		no
8	Prevalent	iTaukei or Rotuman	Female	9.65366	1	832	no	no		no	no		no		no		no
9	Prevalent	iTaukei or Rotuman	Female	24.3504	1	520	no	no		no	no		no		no		no
10	Prevalent	iTaukei or Rotuman	Female	44.3477	1	625	no	no		no	no		no		no		no
11	Prevalent	iTaukei or Rotuman	Female	58.2368	1	589	no	no		no	no		no		no		no
12	Prevalent	iTaukei or Rotuman	Male	41.8125	1	626	no	no		no	no		no		no		no
13	Prevalent	iTaukei or Rotuman	Female	12.8734	1	392	no	no		no	no		no		no		no
14	Prevalent	iTaukei or Rotuman	Female	64	1	604	no	no		no	no		no		no		no
15	Prevalent	iTaukei or Rotuman	Male	19.1704	1	554	no	no		no	no		no		no		no
16	Prevalent	iTaukei or Rotuman	Female	51.3676	1	581	no	no		yes	no	581	no		no		no
17	Prevalent	iTaukei or Rotuman	Female	59.4387	1	601	yes	no	146	no	no		no		yes	450	no
18	Prevalent	iTaukei or Rotuman	Male	20.668	1	749	no	no		no	no		no		no		no
19	Prevalent	Indian descent	Male	65.1389	1	642	no	no		no	no		no		no		no
20	Prevalent	iTaukei or Rotuman	Female	38.8583	1	469	no	no		no	no		no		no		no
21	Prevalent	iTaukei or Rotuman	Female	52.6516	1	602	no	no		no	no		no		no		no
22	Prevalent	iTaukei or Rotuman	Male	17.4483	1	423	no	no		no	no		no		no		no
23	Prevalent	iTaukei or Rotuman	Male	15.3785	1	416	no	no		no	no		no		no		no
24	Prevalent	iTaukei or Rotuman	Female	10.6913	1	491	no	no		no	no		yes	265	no		no
25	Prevalent	iTaukei or Rotuman	Female	12.7118	1	617	no	no		no	no		no		no		no
26	Prevalent	Indian descent	Female	60.5229	1	674	no	no		no	no		no		no		no
27	Prevalent	iTaukei or Rotuman	Female	18.653	1	218	no	no		no	no		no		no		no
28	Prevalent	iTaukei or Rotuman	Female	18.3135	1	246	no	no		no	no		no		no		no
29	Prevalent	iTaukei or Rotuman	Male	41.2868	1	477	no	no		no	no		no		no		no
30	Prevalent	iTaukei or Rotuman	Female	25.0897	1	331	no	no		no	no		yes	0	no		no
32	Prevalent	iTaukei or Rotuman	Female	14.3162	1	686	no	no		no	no		no		no		no
33	Prevalent	Indian descent	Male	17.1061	1	420	no	no		no	no		no		no		no
34	Prevalent	iTaukei or Rotuman	Male	21.1581	1	469	no	no		no	no		no		no		no
35	Prevalent	iTaukei or Rotuman	Female	35.6413	1	726	no	no		no	no		no		no		no
36	Prevalent	iTaukei or Rotuman	Male	23.1869	1	665	no	no		no	no		no		no		no
37	Prevalent	iTaukei or Rotuman	Female	13.1198	1	481	no	no		no	no		no		no		no
38	Prevalent	Indian descent	Female	57.2238	1	594	no	no		no	no		no		no		no
39	Prevalent	Other Pacific Islander	Male	11.8056	1	830	no	no		no	no		no		no		no
40	Prevalent	iTaukei or Rotuman	Female	12.7474	1	762	no	no		no	no		no		no		no
41	Prevalent	iTaukei or Rotuman	Male	15.9097	1	328	no	no		no	no		no		no		no
42	Prevalent	iTaukei or Rotuman	Female	13.5606	1	549	no	no		no	no		no		no		no
43	Prevalent	iTaukei or Rotuman	Male	11.1595	1	617	no	no		no	no		no		no		no
44	Prevalent	Indian descent	Female	57.3251	1	545	no	no		no	no		no		no		no
45	Prevalent	Indian descent	Male	19.937	1	293	no	no		no	no		no		no		no
46	Prevalent	Indian descent	Male	11.5318	1	576	no	no		no	no		no		no		no
47	Prevalent	Indian descent	Male	14.5517	1	689	no	no		no	no		no		no		no
48	Prevalent	Indian descent	Female	17.8809	1	539	no	no		no	no		no		no		no
49	Prevalent	iTaukei or Rotuman	Female	19.8932	1	413	no	no		no	no		no		no		no
50	Prevalent	Indian descent	Male	28.3121	1	560	no	no		no	no		no		no		no
51	Prevalent	iTaukei or Rotuman	Male	13.577	1	588	no	no		no	no		no		no		no
52	Prevalent	iTaukei or Rotuman	Male	14.9897	1	560	no	no		no	no		no		no		no
53	Prevalent	iTaukei or Rotuman	Female	41.3498	1	510	no	no		no	no		no		no		no
54	Prevalent	iTaukei or Rotuman	Male	57.0568	1	660	no	no		no	no		no		no		no
55	Prevalent	iTaukei or Rotuman	Female	54.3792	1	799	no	no		no	no		no		no		no
56	Prevalent	iTaukei or Rotuman	Female	16.6626	1	688	no	no		no	no		no		no		no
57	Prevalent	iTaukei or Rotuman	Female	34.7762	1	557	no	no		yes	no	557	no		no		no
58	Prevalent	iTaukei or Rotuman	Female	20.4271	1	471	no	no		no	no		no		no		no
59	Prevalent	iTaukei or Rotuman	Female	33.9028	1	607	no	no		no	no		no		no		no
60	Prevalent	Indian descent	Female	16.7556	1	619	no	no		no	no		no		no		no
61	Prevalent	iTaukei or Rotuman	Female	33.9466	1	567	yes	no	451	no	no		no		yes	451	no
62	Prevalent	iTaukei or Rotuman	Female	29.5277	1	596	no	no		no	no		no		no		no
63	Prevalent	iTaukei or Rotuman	Male	22.2806	1	628	no	no		no	no		no		no		no
64	Prevalent	Indian descent	Female	28.9391	1	371	no	no		no	no		no		no		no
65	Prevalent	Indian descent	Female	16.9637	1	557	no	no		no	no		no		no		no
66	Prevalent	Indian descent	Male	17.2293	1	385	no	no		no	no		no		no		no
67	Prevalent	iTaukei or Rotuman	Male	18.7461	1	613	no	no		no	no		no		no		no
68	Prevalent	iTaukei or Rotuman	Female	13.7029	1	714	no	no		no	no		no		no		no
69	Prevalent	iTaukei or Rotuman	Male	13.7522	1	716	no	no		no	no		no		no		no
70	Prevalent	Indian descent	Female	40.8104	1	567	no	no		no	no		no		no		no
71	Prevalent	iTaukei or Rotuman	Female	15.4716	1	626	no	no		no	no		no		no		no
72	Prevalent	iTaukei or Rotuman	Female	39.4059	1	722	no	no		no	no		no		no		no
73	Prevalent	iTaukei or Rotuman	Male	47.7426	1	677	no	no		no	no		no		no		no
74	Prevalent	Indian descent	Female	17.1006	1	539	no	no		no	no		no		no		no
75	Prevalent	Indian descent	Male	16.345	1	606	no	no		no	no		no		no		no
76	Prevalent	iTaukei or Rotuman	Male	10.4778	1	587	no	no		no	no		no		no		no
77	Prevalent	iTaukei or Rotuman	Female	19.0226	1	632	no	no		no	no		no		no		no
78	Prevalent	iTaukei or Rotuman	Male	16.0055	1	724	no	no		no	no		no		no		no
79	Prevalent	Indian descent	Male	54.8145	1	587	no	no		no	no		no		no		no
80	Prevalent	iTaukei or Rotuman	Male	14.6146	1	604	no	no		no	no		no		no		no
81	Prevalent	iTaukei or Rotuman	Female	17.5332	1	687	no	no		no	no		no		no		no
82	Prevalent	iTaukei or Rotuman	Male	15.4141	1	646	no	no		no	no		no		no		no
83	Prevalent	iTaukei or Rotuman	Female	13.7632	1	742	no	no		no	no		no		no		no
84	Prevalent	Indian descent	Female	47.2854	1	638	no	no		no	no		no		no		no
85	Prevalent	iTaukei or Rotuman	Female	15.77	1	381	no	no		no	no		no		no		no
86	Prevalent	iTaukei or Rotuman	Female	45.8398	1	784	no	no		no	no		no		no		no
87	Prevalent	iTaukei or Rotuman	Male	52.1232	2	420	no	no		no	no		no		no		no
88	Prevalent	iTaukei or Rotuman	Female	40.9473	1	674	no	no		no	no		no		no		no
89	Prevalent	iTaukei or Rotuman	Female	28.3532	1	772	no	no		no	no		no		no		no
90	Prevalent	iTaukei or Rotuman	Female	39.1485	1	819	no	no		no	no		no		no		no
91	Prevalent	iTaukei or Rotuman	Male	9.76318	1	554	no	no		no	no		no		no		no
92	Prevalent	iTaukei or Rotuman	Female	20.334	1	385	no	no		no	no		yes	335	no		no
93	Prevalent	iTaukei or Rotuman	Male	28.7693	1	570	no	no		no	no		no		no		no
94	Prevalent	iTaukei or Rotuman	Male	16.9035	1	772	no	no		no	no		no		no		no
95	Prevalent	iTaukei or Rotuman	Female	12.9254	1	445	no	no		no	no		no		no		no
96	Prevalent	iTaukei or Rotuman	Female	16.846	1	598	no	no		no	no		no		no		no
97	Prevalent	iTaukei or Rotuman	Male	12.846	1	507	no	no		no	no		no		no		no
98	Prevalent	iTaukei or Rotuman	Female	59.937	1	538	no	no		no	no		no		no		no
99	Prevalent	Indian descent	Female	18.1903	1	417	no	no		no	no		no		no		no
100	Prevalent	iTaukei or Rotuman	Male	38.9432	2	571	yes	no	182	yes	yes	571	no		yes	182	no
101	Prevalent	iTaukei or Rotuman	Female	22.3135	1	642	no	no		no	no		no		no		no
102	Prevalent	iTaukei or Rotuman	Female	31.9316	1	379	no	no		no	no		no		no		no
103	Prevalent	iTaukei or Rotuman	Female	35.1458	1	735	no	no		no	no		no		no		no
104	Prevalent	iTaukei or Rotuman	Female	17.6263	1	491	no	no		no	no		no		no		no
105	Prevalent	iTaukei or Rotuman	Male	21.6454	1	524	no	no		no	no		no		no		no
106	Prevalent	iTaukei or Rotuman	Male	22.2861	1	590	no	no		no	no		no		no		no
107	Prevalent	Indian descent	Female	13.4867	1	729	no	no		no	no		no		no		no
108	Prevalent	iTaukei or Rotuman	Female	32.4162	1	696	no	no		no	no		no		no		no
110	Prevalent	iTaukei or Rotuman	Male	52.4162	1	367	no	no		yes	no	367	no		no		no
111	Prevalent	iTaukei or Rotuman	Female	11.6632	1	596	no	no		no	no		no		no		no
112	Incident	iTaukei or Rotuman	Female	32.1807	1	91	no	no		no	no		no		no		no
113	Incident	iTaukei or Rotuman	Female	12.0192	1	791	no	no		no	no		no		no		no
114	Incident	iTaukei or Rotuman	Female	28.6762	1	537	no	no		no	no		no		no		no
115	Incident	iTaukei or Rotuman	Female	15.4962	1	702	no	no		no	no		no		no		no
116	Incident	iTaukei or Rotuman	Female	18.3847	1	700	no	no		no	no		no		no		no
117	Incident	Indian descent	Female	14.3518	1	237	no	no		no	no		no		no		no
118	Incident	iTaukei or Rotuman	Female	12.8624	1	680	no	no		no	no		no		no		no
119	Incident	iTaukei or Rotuman	Male	15.5291	1	553	no	no		no	no		no		no		no
120	Incident	iTaukei or Rotuman	Female	19.9069	1	103	no	no		no	no		no		no		no
121	Incident	Other Pacific Islander	Female	34.2697	1	21	no	no		yes	no	21	no		no		no
122	Incident	iTaukei or Rotuman	Female	11.8741	1	225	no	no		no	no		no		no		no
123	Incident	iTaukei or Rotuman	Female	24.7036	1	446	no	no		no	no		no		no		no
126	Incident	Other Pacific Islander	Female	39.5044	1	817	no	no		no	no		no		no		no
127	Incident	iTaukei or Rotuman	Female	26.1081	1	98	no	no		no	no		no		no		no
128	Incident	iTaukei or Rotuman	Female	13.4127	1	731	no	no		no	no		no		no		no
129	Incident	Other Pacific Islander	Female	32.5832	2	826	no	no		no	no		no		no		no
130	Incident	Indian descent	Male	9.78508	1	168	no	no		no	no		no		no		no
131	Incident	iTaukei or Rotuman	Female	31.0089	1	869	no	no		no	no		no		no		no
133	Incident	iTaukei or Rotuman	Male	20.2902	1	294	no	no		no	no		yes	-4	no		no
134	Incident	iTaukei or Rotuman	Female	16.6105	1	665	no	no		no	no		no		no		no
135	Incident	Indian descent	Female	31.436	1	659	no	no		no	no		no		no		no
136	Incident	iTaukei or Rotuman	Male	11.5619	1	120	no	no		no	no		no		no		no
137	Incident	iTaukei or Rotuman	Male	10.4559	1	633	no	no		no	no		no		no		no
138	Incident	iTaukei or Rotuman	Male	21.4127	1	827	no	no		no	no		no		no		no
139	Incident	iTaukei or Rotuman	Female	10.5791	1	295	no	no		no	no		no		no		no
142	Incident	iTaukei or Rotuman	Female	30.8419	1	591	no	no		no	no		no		no		no
143	Incident	iTaukei or Rotuman	Male	10.8747	1	617	no	no		no	no		no		no		no
144	Incident	iTaukei or Rotuman	Female	11.8877	1	204	no	no		no	no		no		no		no
145	Incident	iTaukei or Rotuman	Female	28.0958	1	165	no	no		no	no		no		no		no
146	Incident	iTaukei or Rotuman	Female	14.4422	1	414	no	no		no	no		no		no		no
147	Incident	iTaukei or Rotuman	Male	11.6632	1	229	no	no		no	no		no		no		no
149	Incident	iTaukei or Rotuman	Male	27.6413	2	832	yes	no	207	no	no		no		no		no
150	Incident	iTaukei or Rotuman	Female	34.694	1	554	no	no		no	no		no		no		no
151	Incident	iTaukei or Rotuman	Male	37.2539	1	820	no	no		no	no		no		no		no
152	Incident	iTaukei or Rotuman	Male	28.3176	1	859	no	no		no	no		no		no		no
153	Incident	iTaukei or Rotuman	Female	36.4928	1	592	yes	no	73	no	no		no		yes	73	no
154	Incident	iTaukei or Rotuman	Male	3.60849	1	862	no	no		no	no		no		no		no
155	Incident	iTaukei or Rotuman	Female	14.3874	1	795	no	no		no	no		no		no		no
156	Incident	iTaukei or Rotuman	Male	11.7125	2	155	no	no		no	no		no		no		no
157	Incident	iTaukei or Rotuman	Female	32.5695	1	207	no	no		no	no		no		no		no
159	Incident	iTaukei or Rotuman	Male	11.5674	1	300	no	no		no	no		no		no		no
160	Incident	iTaukei or Rotuman	Female	21.7084	1	814	yes	no	332	no	no		no		no		yes	332
161	Incident	iTaukei or Rotuman	Female	12.0575	1	734	no	no		no	no		no		no		no
162	Incident	iTaukei or Rotuman	Male	18.6338	1	261	no	no		no	no		yes	-6	no		no
163	Incident	iTaukei or Rotuman	Female	5.67556	1	148	no	no		no	no		no		no		no

## Sheet: Dictionary
Variable	Definition
case	Study number
category	Category for study
ethnicity	Ethnicity
sex	Biological sex
age_entry	Age at study entry
baseline_nyha	New York Heart Association
exit_study	Exit from study in days
primary_outcome_event_during	Primary outcome during follow-up
prior_outcome_event	Prior primary outcome event
time_to_primary_outcome	Time to primary outcome or exit in days
died	Died during follow-up
rhd_attr_death	RHD-attributable death
time_to_death	Time in to death in days
arf_event	ARF event recorded
time_to_arf	Time to ARF recurrence in days
heart_failure_event	Heart failure hospitalisation event in days
time_to_heart_failure	Time to heart failure event in days
stroke_event	Stroke event recorded
time_to_stroke	Time to stroke event in days
